# Supplementary material
Source: PubMed Central journal article supplement (PMC280561)

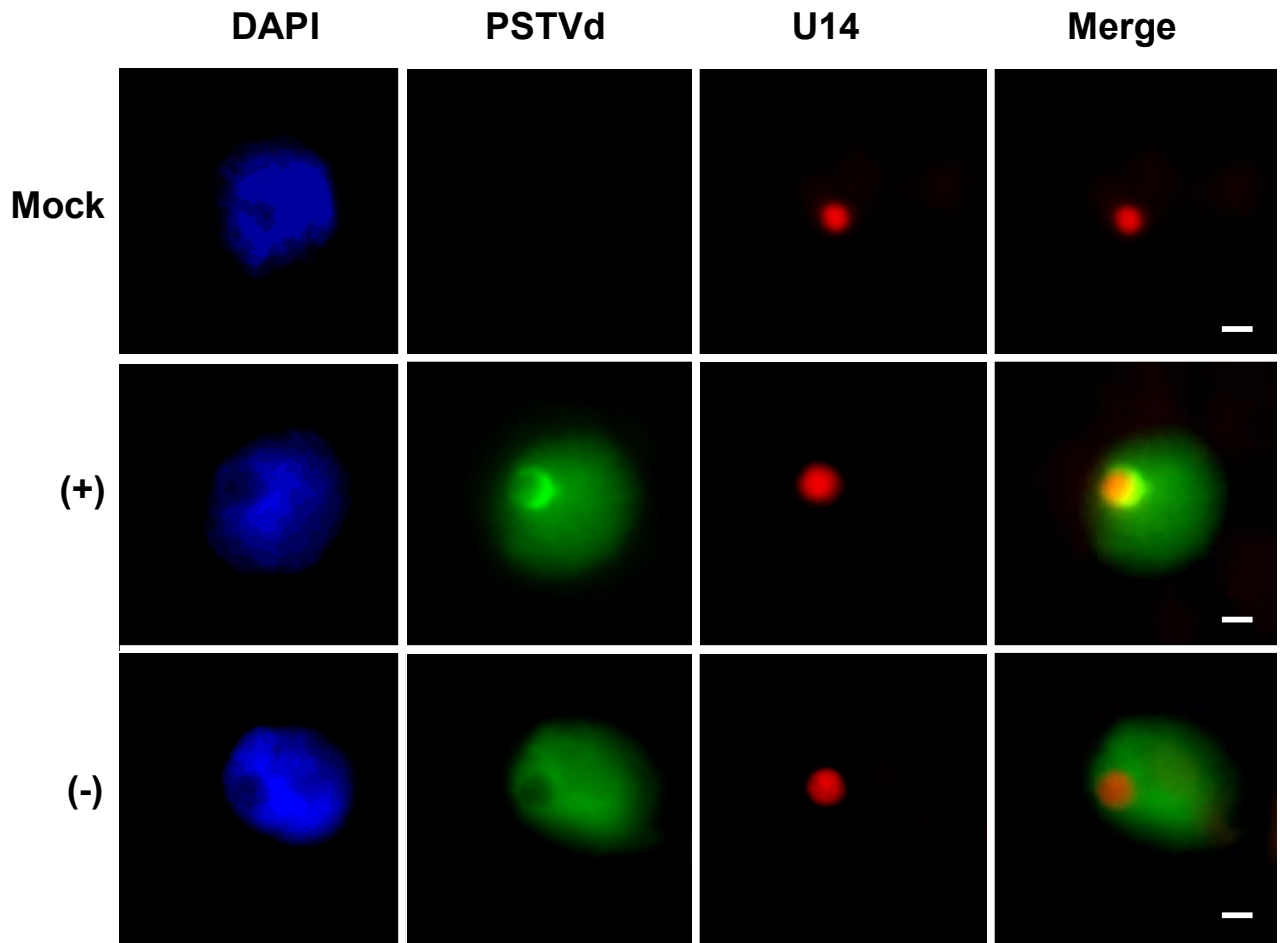

Supplement: plntcell_15_11_2566__1.pdf [file plntcell_15_11_2566__1.pdf]

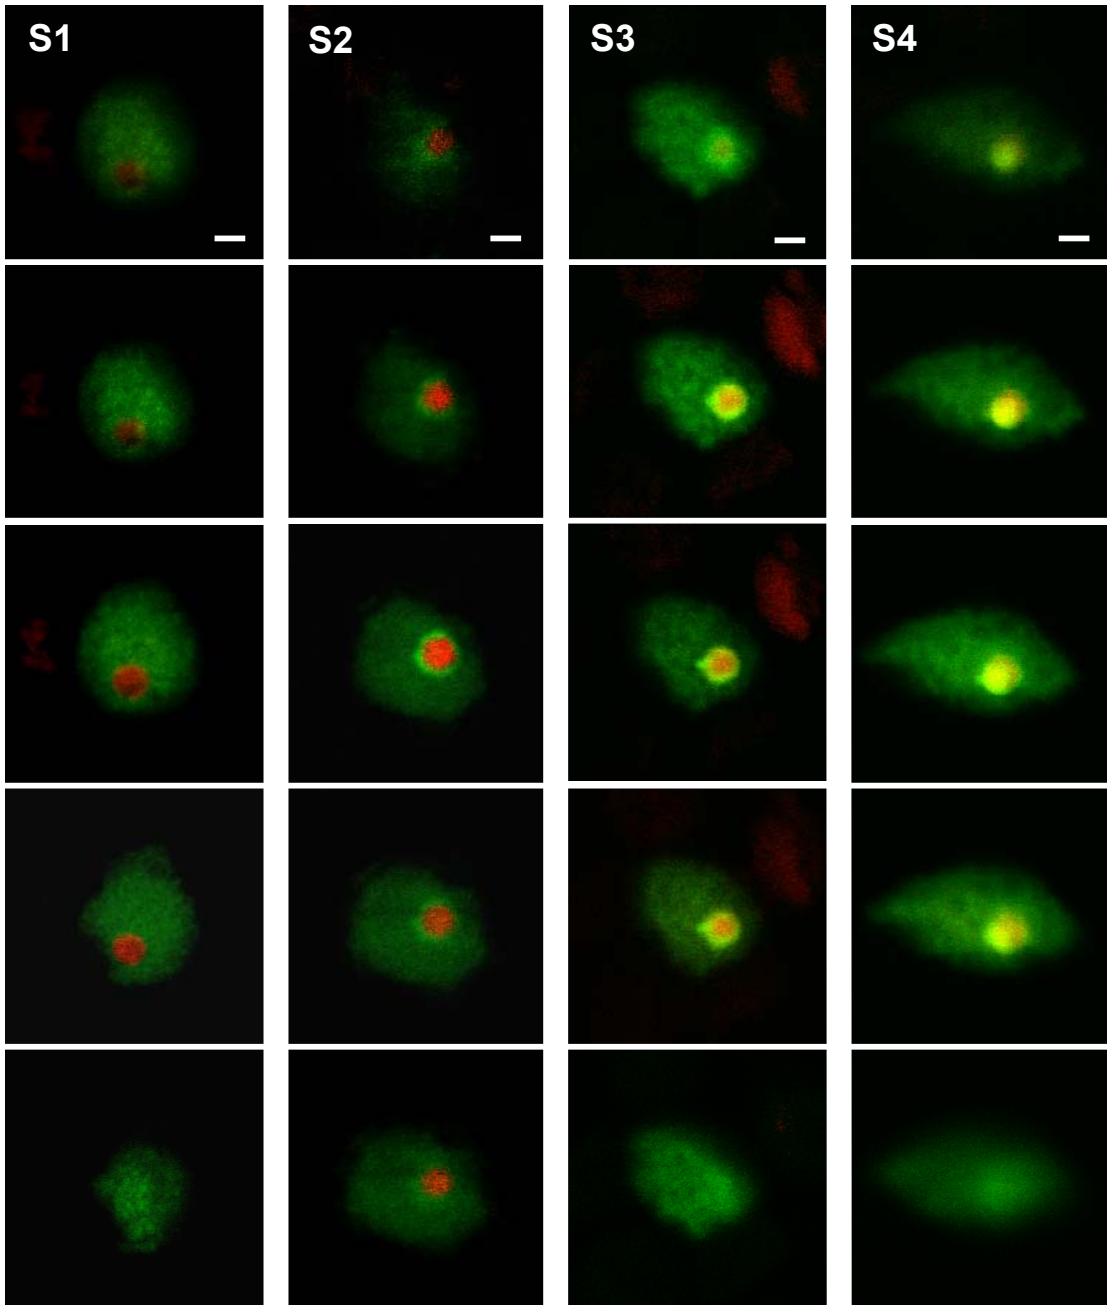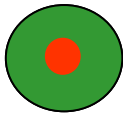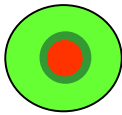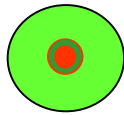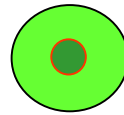

Supplement: plntcell_15_11_2566__2.pdf [file plntcell_15_11_2566__2.pdf]

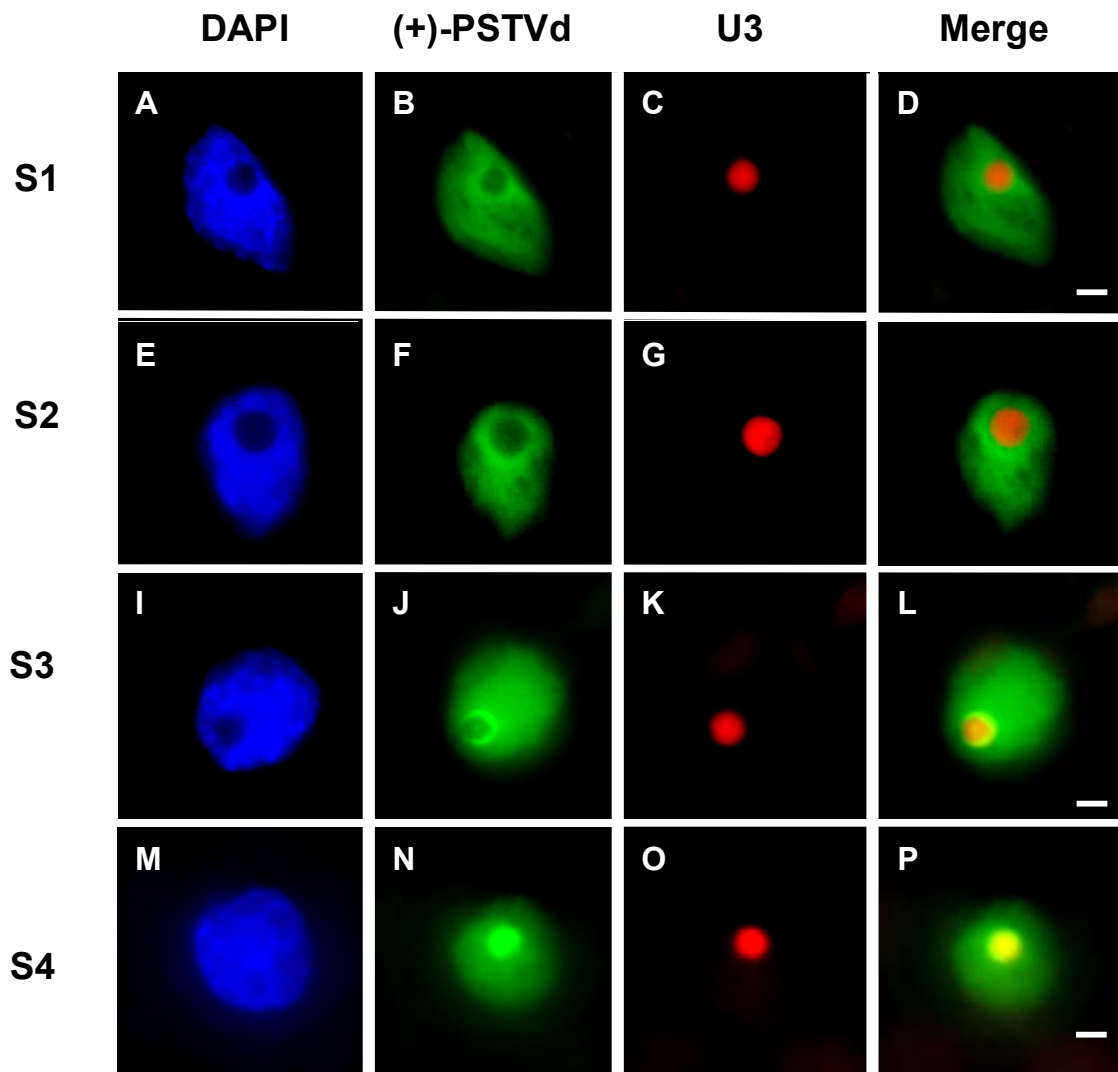

Supplement: plntcell_15_11_2566__3.pdf [file plntcell_15_11_2566__3.pdf]
